# Supplementary material for: Guanine Deaminase in Human Epidermal Keratinocytes Contributes to Skin Pigmentation
Source: PubMed Central journal article supplement (PMC7321356; doi:10.3390/molecules25112637), 2020-06-05
Supplement: molecules-25-02637-s001.pdf [file molecules-25-02637-s001.pdf]

Supplementary Materials

**Table S1.** Clinical features of patients with Riehl’s melanosis who were included in next generation sequencing and quantitative PCR

| Next generation sequencing |     |     |          |                       |                                |
|----------------------------|-----|-----|----------|-----------------------|--------------------------------|
| Patient number             | Age | Sex | Location | Fitzpatrick skin type | Description of skin lesions    |
| 1                          | 59  | F   | neck     | IV                    | reticulated dark brown patches |
| 2                          | 72  | F   | cheek    | IV                    | diffuse brownish patches       |
| 3                          | 59  | F   | cheek    | IV                    | diffuse dark brown patches     |
| Quantitative PCR           |     |     |          |                       |                                |
| 2                          | 72  | F   | cheek    | IV                    | diffuse brownish patches       |
| 4                          | 80  | M   | forehead | IV                    | reticulated brownish patches   |
| 5                          | 45  | F   | cheek    | IV                    | diffuse dark brown patches     |
| 6                          | 67  | M   | neck     | IV                    | reticulated dark brown patches |

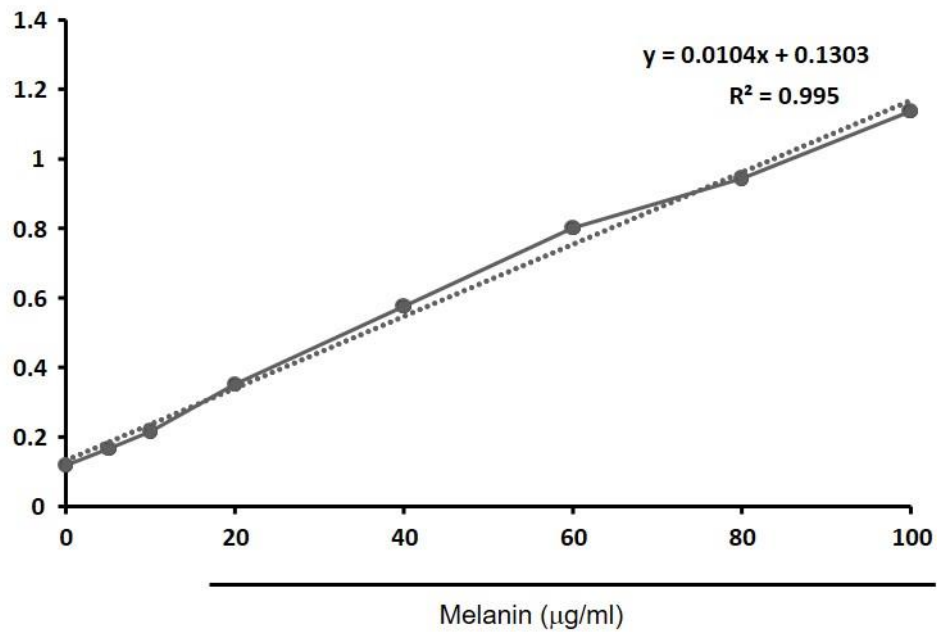

**Figure S1.** The standard curve with synthetic melanin

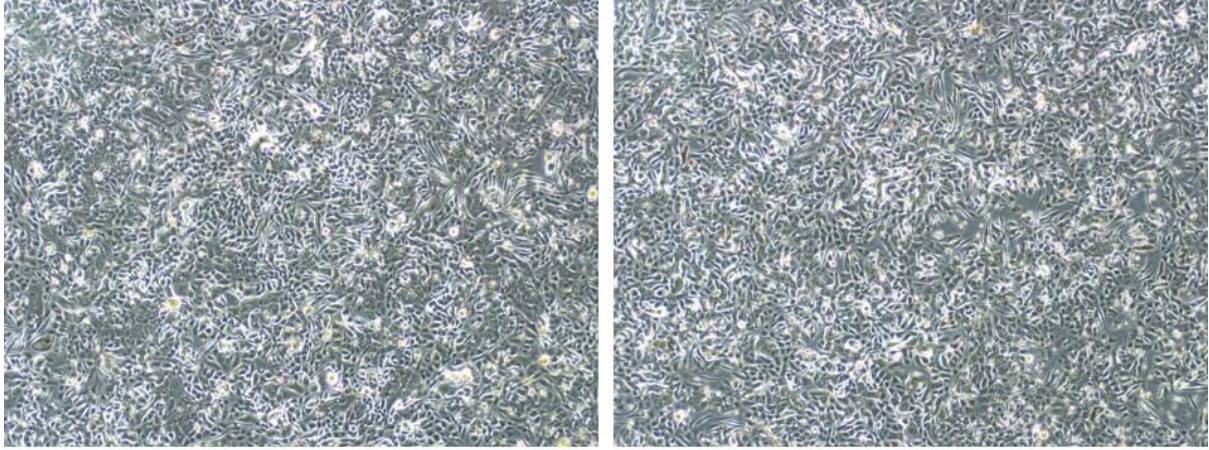

**siNC**

**siGDA**

**Figure S2.** Phase contrast images of keratinocyte-melanocyte coculture for 5 days
